# Supplementary material for: MXP(M = Co/Ni)@carbon core–shell nanoparticles embedded in 3D cross-linked graphene aerogel derived from seaweed biomass for hydrogen evolution reaction
Source: Royal Society of Chemistry journal article supplement (doi:10.1039/c8nr02852d), 2018-01-01
Supplement: c8nr02852d1.pdf [file c8nr02852d1.pdf]

# $M_xP(M=Co/Ni)@Carbon$ Core–Shell Nanoparticles Embedded in 3D Cross-linked Graphene Aerogels Derived from Seaweed Biomass for Hydrogen Evolution Reaction

Wentong Zhao<sup>a</sup>, Xiaoqing Lu<sup>a</sup>, Manickam Selvaraj<sup>a</sup>, Wei Wei<sup>\*a</sup>, Zhifeng Jiang<sup>a,b</sup>, Nabi Ullah<sup>a</sup>, Jie Liu<sup>a</sup> and Jimin Xie<sup>\*a</sup>

<sup>a</sup> School of Chemistry & Chemical Engineering, Jiangsu University, Zhenjiang, PR China

<sup>b</sup> School of Life Sciences, The Chinese University of Hong Kong, Hong Kong, PR China

\*Corresponding authors: Jimin Xie; Tel.: +86-511-88791708; Fax: +86-511-88791800;

E-mail: weiwei@ujs.edu.cn, xiejm391@sohu.com.

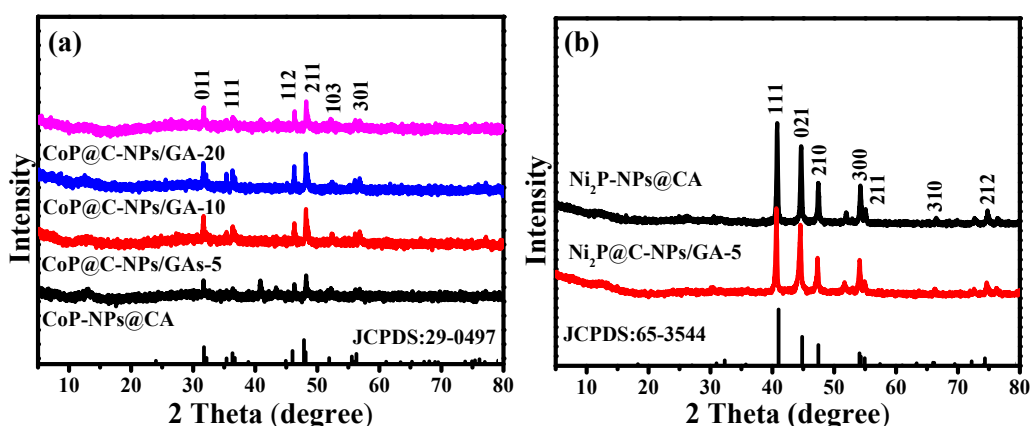

**Figure S1** (a) XRD patterns of CoP-NPs@CA and CoP@C-NPs/GA-x, (b) Ni<sub>2</sub>P-NPs@CA and Ni<sub>2</sub>P@C-NPs/GA-x

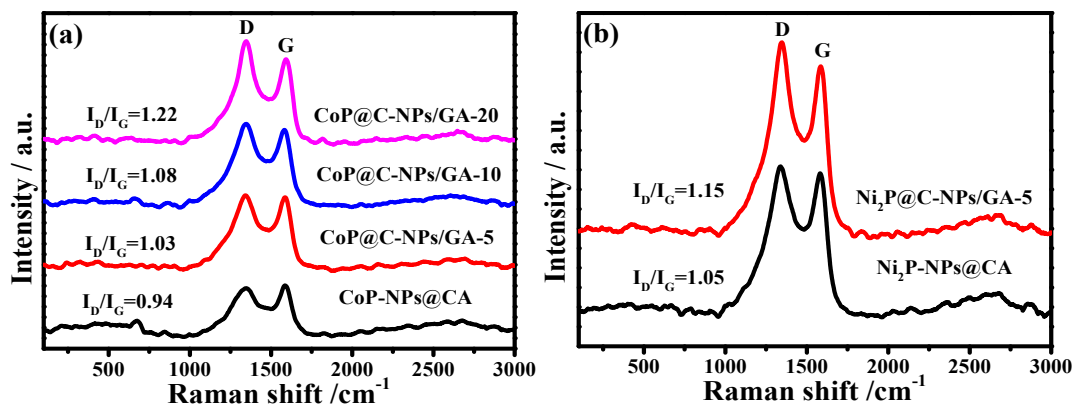

**Figure S2** (a) Raman spectra of CoP-NPs@CA and CoP@C-NPs/GA-x, (b) Ni<sub>2</sub>P-NPs@CA and Ni<sub>2</sub>P@C-NPs/GA-5.

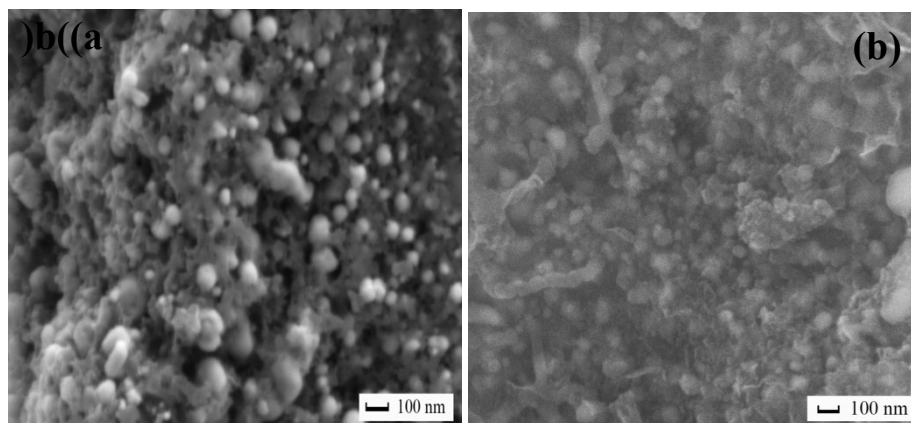

**Figure S3** FESEM images of different mass ratio of graphene oxide (a)  $\text{Ni}_2\text{P-NPs@CA}$ , (b)  $\text{Ni}_2\text{P@C-NPs/GA-5}$ .

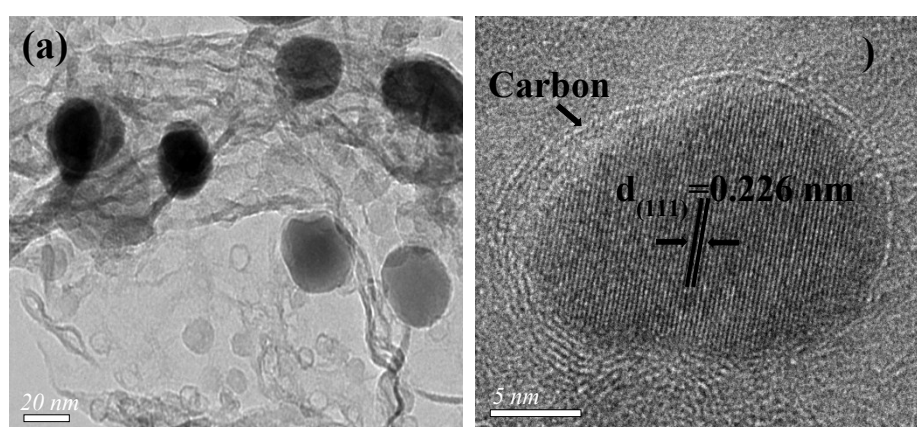

**Figure S4** (a) High-magnification TEM images of the synthesized  $\text{Ni}_2\text{P@C-NPs/GA-5}$ , (b) HRTEM images of  $\text{Ni}_2\text{P@C-NPs/GA-5}$ .

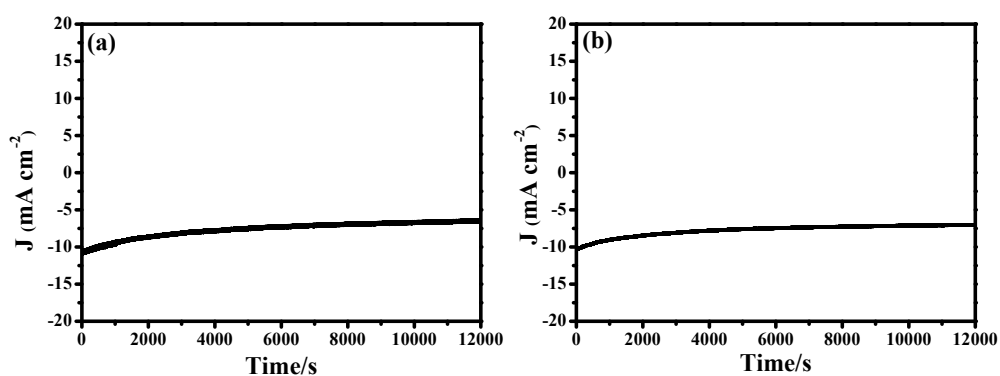

**Figure S5** Stability tests of  $\text{Ni}_2\text{P@C-NPs/GA-5}$  using the chronopotentiometric measurements (without iR corrections) with the fixed current density of  $10 \text{ mA cm}^{-2}$  in (a)  $0.5 \text{ M H}_2\text{SO}_4$  and (b)  $1 \text{ M KOH}$  solutions.

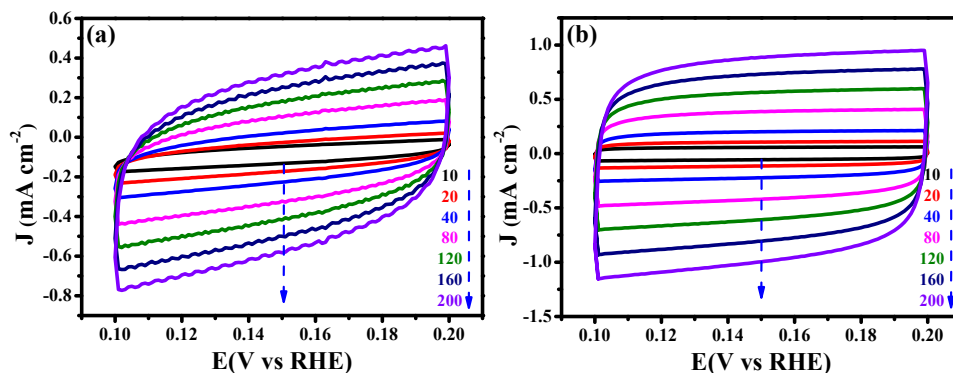

**Figure S6** CVs performed at various scan rates in the region of 0.10–0.20 V versus RHE for CoP-NPs@CA electrocatalyst (a) in 0.5 M H<sub>2</sub>SO<sub>4</sub> electrolytes and (b) in 1 M KOH electrolytes.

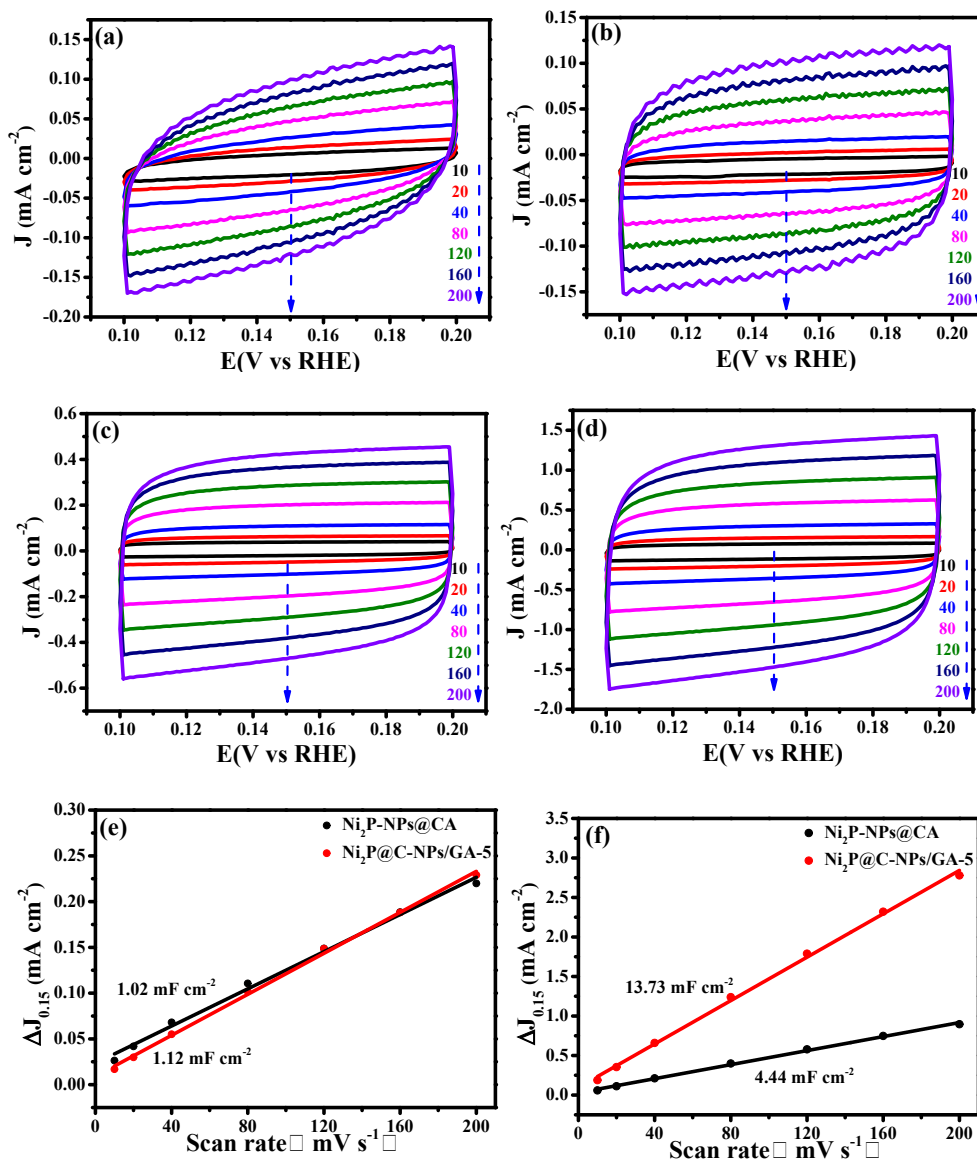

**Figure S7** CVs performed at various scan rates in the region of 0.10–0.20 V versus RHE for Ni<sub>2</sub>P-NPs@CA (a) in 0.5 M H<sub>2</sub>SO<sub>4</sub> electrolytes and (c) in 1 M KOH electrolytes, Ni<sub>2</sub>P@C-NPs/GA-5 (b) in 0.5 M H<sub>2</sub>SO<sub>4</sub> electrolytes and (d) in 1 M KOH electrolytes. Ni<sub>2</sub>P-NPs/CA and Ni<sub>2</sub>P@C-NPs/GA-5 in current density at 0.15 V versus RHE

plotted against the scan rate and fitted to a linear regression allows for the estimation of  $C_{dl}$  (e) in 0.5 M  $H_2SO_4$  electrolytes and (f) in 1 M KOH electrolytes.

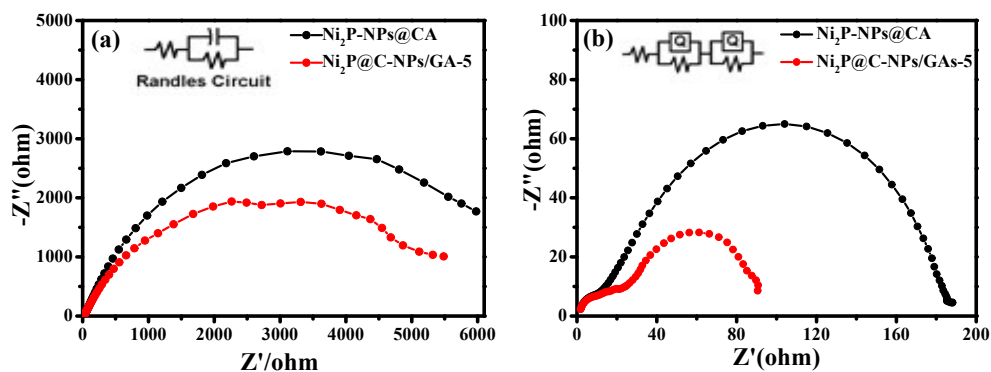

**Figure S8** Nyquist plots of  $Ni_2P-NPs@CA$  and  $Ni_2P@C-NPs/GA-5$  over the frequency range from 100 kHz to 0.1Hz (a) at  $\eta=135$  mV with an AC voltage of 10 mV in in 0.5 M  $H_2SO_4$  electrolytes,(b) at  $\eta=377$  mV with an AC voltage of 10 mV in 1 M KOH electrolytes.

**Table S1** Comparison of catalytic parameters of different HER catalysts in 0.5 M H<sub>2</sub>SO<sub>4</sub>.

|                                                              | Loading<br>(mg.cm <sup>-2</sup> ) | $\eta_{10}$<br>(mV) | Tafel slop<br>(mV dec <sup>-1</sup> ) | $C_{dl}$<br>(mF cm <sup>-2</sup> ) | Reference       |
|--------------------------------------------------------------|-----------------------------------|---------------------|---------------------------------------|------------------------------------|-----------------|
| <b>Porous CoP concave polyhedron</b>                         | <b>0.35</b>                       | <b>133</b>          | <b>51</b>                             | /                                  | <b>1</b>        |
| <b>CoP@C</b>                                                 | <b>0.31</b>                       | <b>130</b>          | <b>64</b>                             | <b>9.30</b>                        | <b>2</b>        |
| <b>CoP@NC-T</b>                                              | <b>0.31</b>                       | <b>124</b>          | <b>59</b>                             | <b>9.90</b>                        | <b>2</b>        |
| <b>CoP Hollow Polyhedron</b>                                 | <b>0.10</b>                       | <b>159</b>          | <b>59</b>                             | /                                  | <b>3</b>        |
| <b>CoP/CNTs</b>                                              | /                                 | <b>139</b>          | <b>52</b>                             | /                                  | <b>4</b>        |
| <b>Co@NC/NG</b>                                              | <b>0.29</b>                       | /                   | <b>79</b>                             | <b>37.30</b>                       | <b>5</b>        |
| <b>Co@NGF</b>                                                | <b>0.28</b>                       | <b>125</b>          | <b>94</b>                             | /                                  | <b>6</b>        |
| <b>Ni<sub>2</sub>P/N-doped Graphene</b>                      | <b>0.18</b>                       | <b>102</b>          | <b>59</b>                             | /                                  | <b>7</b>        |
| <b>CoSe<sub>2</sub>@DC</b>                                   | <b>0.36</b>                       | <b>132</b>          | <b>82</b>                             | <b>51.10</b>                       | <b>8</b>        |
| <b>Ni<sub>5</sub>P<sub>4</sub>-Ni<sub>2</sub>P nanosheet</b> | <b>68.2</b><br>(electrode)        | <b>120</b>          | <b>79</b>                             | /                                  | <b>9</b>        |
| <b>Ni<sub>12</sub>P<sub>5</sub>/CNT</b>                      | <b>0.18</b>                       | <b>240</b>          | <b>81</b>                             | /                                  | <b>10</b>       |
| <b>MoP</b>                                                   | <b>0.36</b>                       | <b>125</b>          | <b>54</b>                             | /                                  | <b>11</b>       |
| <b>Mo<sub>2</sub>C@NC</b>                                    | <b>0.28</b>                       | <b>124</b>          | <b>60</b>                             | <b>73.20</b>                       | <b>12</b>       |
| <b>SV-MoS<sub>2</sub></b>                                    | /                                 | <b>170</b>          | <b>60</b>                             | /                                  | <b>13</b>       |
| <b>CoP NPs</b>                                               | <b>0.35</b>                       | <b>221</b>          | <b>87</b>                             | /                                  | <b>14</b>       |
| <b>Free CoP NPs</b>                                          | /                                 | <b>167</b>          | <b>88</b>                             | <b>2.57</b>                        | <b>15</b>       |
| <b>CoP-RGO</b>                                               | /                                 | <b>157</b>          | <b>70</b>                             | <b>5.23</b>                        | <b>15</b>       |
| <b>Mo<sub>3</sub>S<sub>13</sub>@rGO-CNTs</b>                 | /                                 | <b>179</b>          | <b>67</b>                             | /                                  | <b>26</b>       |
| <b>aerogels</b>                                              |                                   |                     |                                       |                                    |                 |
| <b>GCA-MoSe<sub>2</sub>-2 aerogels</b>                       | /                                 | <b>228</b>          | <b>68</b>                             | <b>1.31</b>                        | <b>27</b>       |
| <b>MoSe<sub>2</sub>/carbon fiber aerogel</b>                 | /                                 | <b>179</b>          | <b>62</b>                             | /                                  | <b>28</b>       |
| <b>CoP@C-NPs/GA-5</b>                                        | <b>0.28</b>                       | <b>120</b>          | <b>57</b>                             | <b>55.83</b>                       | <b>Our work</b> |

**Table S2** Comparison of catalytic parameters of different HER catalysts in 1 M KOH.

|                                                  | <b>Loading<br/>(mg.cm<sup>-2</sup>)</b> | <b><math>\eta_{10}</math><br/>(mV)</b> | <b>Tafel slop<br/>(mV dec<sup>-1</sup>)</b> | <b><math>C_{dl}</math><br/>(mF cm<sup>-2</sup>)</b> | <b>Reference</b> |
|--------------------------------------------------|-----------------------------------------|----------------------------------------|---------------------------------------------|-----------------------------------------------------|------------------|
| <b>CoP@C</b>                                     | <b>0.31</b>                             | <b>170</b>                             | <b>83</b>                                   |                                                     | <b>2</b>         |
| <b>CoP/NF</b>                                    | <b>/</b>                                | <b>182</b>                             | <b>109</b>                                  | <b>/</b>                                            | <b>16</b>        |
| <b>CoP nanowire<br/>arrays/CC</b>                | <b>0.92</b>                             | <b>209</b>                             | <b>129</b>                                  | <b>/</b>                                            | <b>17</b>        |
| <b>CoP nanoparticle/Ti</b>                       | <b>0.18</b>                             | <b>170</b>                             | <b>66</b>                                   |                                                     | <b>18</b>        |
| <b>NiMoN/CC</b>                                  | <b>1.10</b>                             | <b>109</b>                             | <b>95</b>                                   | <b>21</b>                                           | <b>19</b>        |
| <b>Ni-P/CP</b>                                   | <b>25.80</b>                            | <b>117</b>                             | <b>85</b>                                   |                                                     | <b>20</b>        |
| <b>FeP nanorod<br/>arrays/CC</b>                 | <b>1.50</b>                             | <b>218</b>                             | <b>146</b>                                  | <b>/</b>                                            | <b>21</b>        |
| <b>NiFeVS/NF</b>                                 | <b>38.25</b>                            | <b>161</b>                             | <b>96</b>                                   | <b>32.30</b>                                        | <b>22</b>        |
|                                                  | <b>(electrode)</b>                      |                                        |                                             |                                                     |                  |
| <b>WP<sub>2</sub></b>                            | <b>/</b>                                | <b>225</b>                             | <b>84</b>                                   |                                                     | <b>23</b>        |
| <b>Lepidocrocite VOOH<br/>hollow nanospheres</b> | <b>0.80</b>                             | <b>164</b>                             | <b>104</b>                                  |                                                     | <b>24</b>        |
| <b>Fe<sub>2</sub>O<sub>3</sub>/Fe@CN</b>         | <b>0.28</b>                             | <b>330</b>                             | <b>114</b>                                  | <b>16.20</b>                                        | <b>25</b>        |
| <b>CoP@C-NPs/GA-5</b>                            | <b>0.28</b>                             | <b>225</b>                             | <b>66</b>                                   | <b>18.85</b>                                        | <b>Our work</b>  |

## References

1. M. Xu, L. Han, Y. Han, Y. Yu, J. Zhai, S. Dong, *J. Mater. Chem. A*, 2015, **3**, 21471.
2. F. Yang, Y. Chen, G. Cheng, S. Chen, W. Luo, *ACS Catalysis*, 2017, **7**, 1602355.
3. M. Liu, J. Li, *ACS Appl. Mater. Interfaces*, 2016, **8**, 2158.
4. C. Wu, Y. Yang, D. Dong, Y. Zhang, J. Li, *Small*, 2017, **13**, 1602873.
5. W. J. Zhou, J. Zhou, Y. C. Zhou, J. Lu, K. Zhou, L. J. Yang, Z. H. Tang, L. G. Li, S. W. Chen, *Chem. Mater.*, 2015, **27**, 2026.
6. D. Hou, W. Zhou, K. Zhou, Y. Zhou, J. Zhong, L. Yang, J. Lu, G. Li, S. Chen, *J. Mater. Chem. A*, 2015, **3**, 15962.
7. Y. Pan, N. Yang, Y. Chen, Y. Lin, Y. Li, Y. Liu, C. Liu, *Journal of Power Sources*, 2015, **297**, 45-52.
8. W. Zhou, J. Lu, K. Zhou, L. Yang, Y. Ke, Z. Tang, S. Chen, *Nano Energy*, 2016, **28**, 143.
9. X. Wang, Y. V. Kolen'ko, X. Q. Bao, K. Kovnir, L. Liu, *Angew. Chem. Int. Ed.* 2015, **54**, 8188–8192.
10. Y. Pan, W. Hu, D. Liu, Y. Liu, C. Liu, *J. Mater. Chem. A*, 2015, **3**, 13087–13094.
11. Z. Xing, Q. Liu, A. M. Asiri, X. Sun, *Adv. Mater.*, 2014, **26**, 5702–5707.
12. Y. Liu, G. Yu, G. D. Li, Y. Sun, T. Asefa, W. Chen, X. Zou, *Angew. Chem. Int. Ed.* 2015, **54**, 10752–10757.
13. H. Li, C. Tsai, A. L. Koh, L. Cai, A. W. Contryman, A. H. Fragapane, J. Zhao, H. S. Han, H. C. Manoharan, F. Abild-Pedersen, J. K. Nørskov, X. Zheng, *Nat. Mater.*, 2016, **15**, 48–54.
14. P. Jiang, Q. Liu, C. Ge, W. Cui, Z. Pu, A. M. Asiri, X. Sun, *J. Mater. Chem. A*, 2014, **2**, 14634.
15. M. Li, X. Liu, Y. Xiong, X. Bo, Y. Zhang, C. Han, L. Guo, *J. Mater. Chem. A*, 2015, **3**, 4255.
16. Y. Xua, C. Yuan, Z. Liua, X. Chen, *Catalysis Science & Technology*, 2018, **8**, 128-133.
17. J. Tian, Q. Liu, A. M. Asiri, X. Sun, *J. Am. Chem. Soc.*, 2014, **136**, 7587–7590.
18. D. H. Ha, B. Han, M. Risch, L. Giordano, K. P. C. Yao, P. Karayaylali, Y. Shao-Horn, *Nano Energy*, 2016, **29**, 37–45.
19. Y. Q. Zhang, B. Ouyang, J. Xu, S. Chen, R. S. Rawat, H. J. Fan, *Adv. Energy Mater.*, 2016, **6**, 1600221.
20. X. Wang, W. Li, D. Xiong, D. Y. Petrovykh, L. Liu, *Adv. Funct. Mater.*, 2016, **26**, 4067–4077.
21. Y. Liang, Q. Liu, A. M. Asiri, X. Sun, Y. Luo, *ACS Catal.*, 2014, **4**, 4065–4069.
22. X. Shang, J. Chi, Z. Liu, B. Dong, K. Yan, W. Gao, J. Zeng, Y. Chai, C. Liu, *Electrochimica Acta*, 2017, **256**, 241–251.
23. H. Du, S. Gu, R. Liu, C. Li, *J. Power Source*, 2015, **278**, 540–545.
24. H. Shi, H. Liang, F. Ming, Z. Wang, *Angew. Chem. Int. Ed.*, 2017, **56**, 588–592.
25. D. F. Su, J. Wang, H. Y. Jin, Y. T. Gong, M. M. Li, Z. F. Pang, Y. Wang, *J. Mater. Chem. A*, 2015, **3**, 11756.
26. Y. Shang, X. Xu, B. Gao, Z. Ren, *ACS Sustainable Chem. Eng.*, 2017, **5**, 8908-8917.
27. Y. Shi, W. Gao, H. Lu, Y. Huang, L. Zuo, W. Fan, T. Liu, *ACS Sustainable Chem. Eng.*, 2017, **5**, 6994-7002.
28. Y. Zhang, L. Zuo, L. Zhang, Y. Huang, H. Lu, W. Fan, T. Liu, *ACS Appl. Mater. Interfaces*, 2016, **8**, 7077-7085.
